# Supplementary figures and images for: Divergent Metabolomic Signatures of TGFβ2 and TNFα in the Induction of Retinal Epithelial-Mesenchymal Transition
Source: MDPI journal article supplement (doi:10.3390/metabo13020213), 2023-01-31

A)

## TGFβ2-treated H-RPE cells vs control

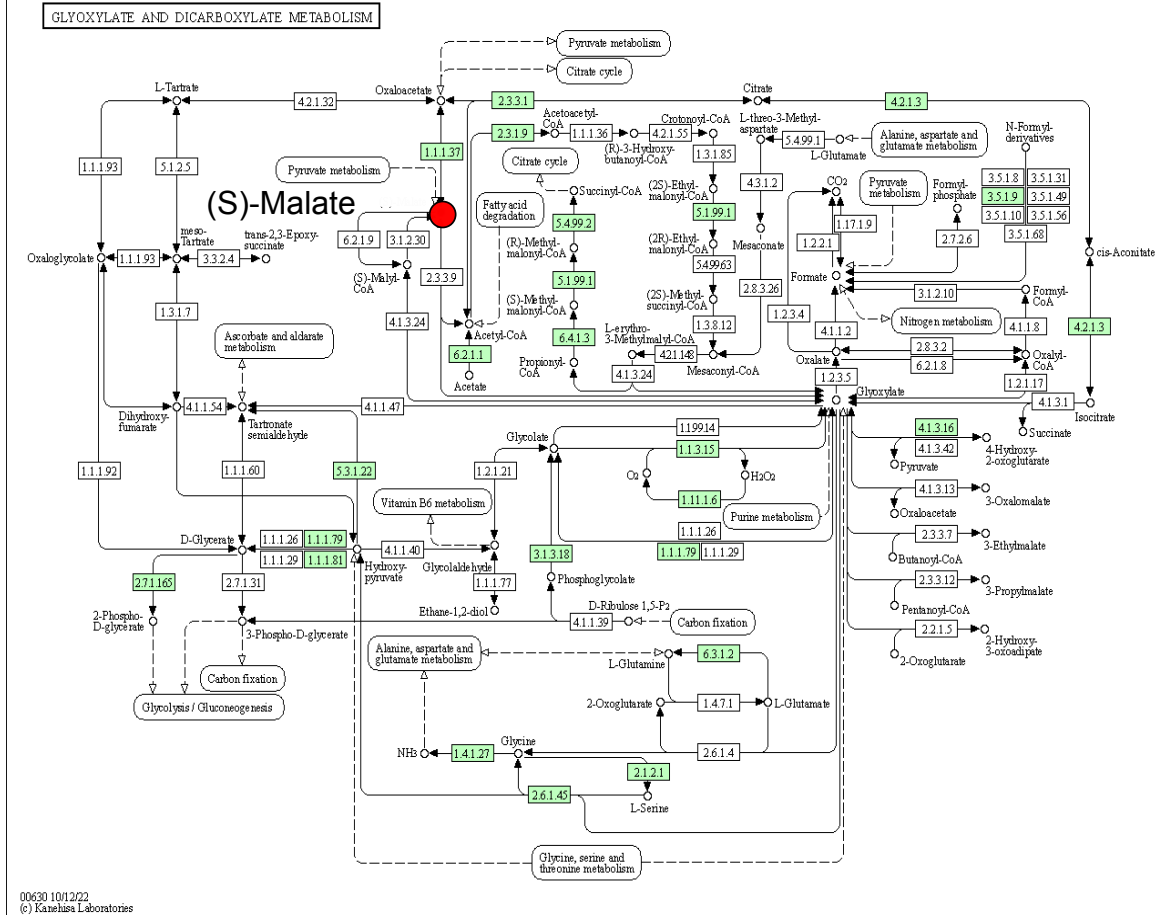

B)

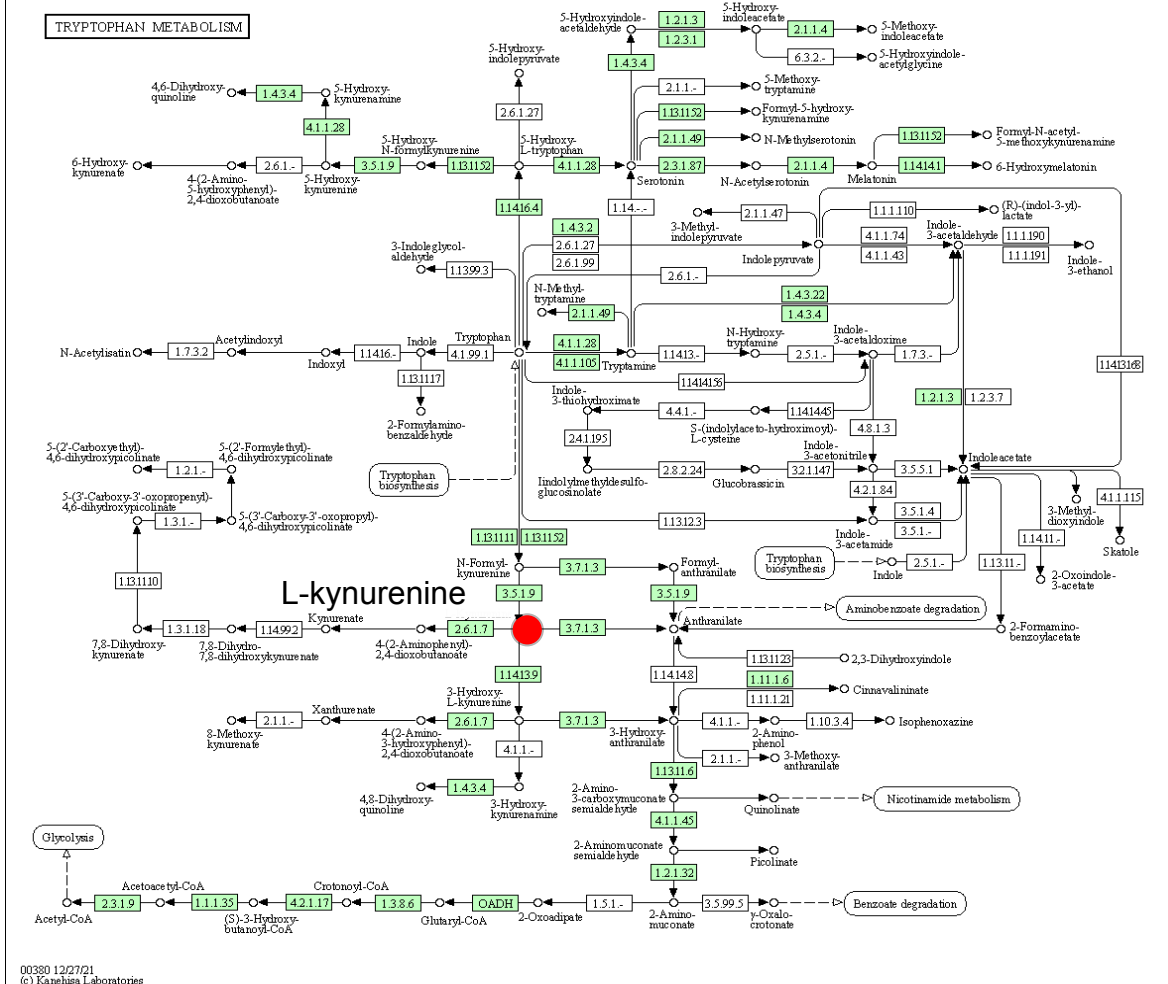

Supplement: s1 [file s1]

### TNF $\alpha$ -treated H-RPE cells vs control

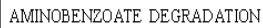

Supplement: s1 [file s1]

A)

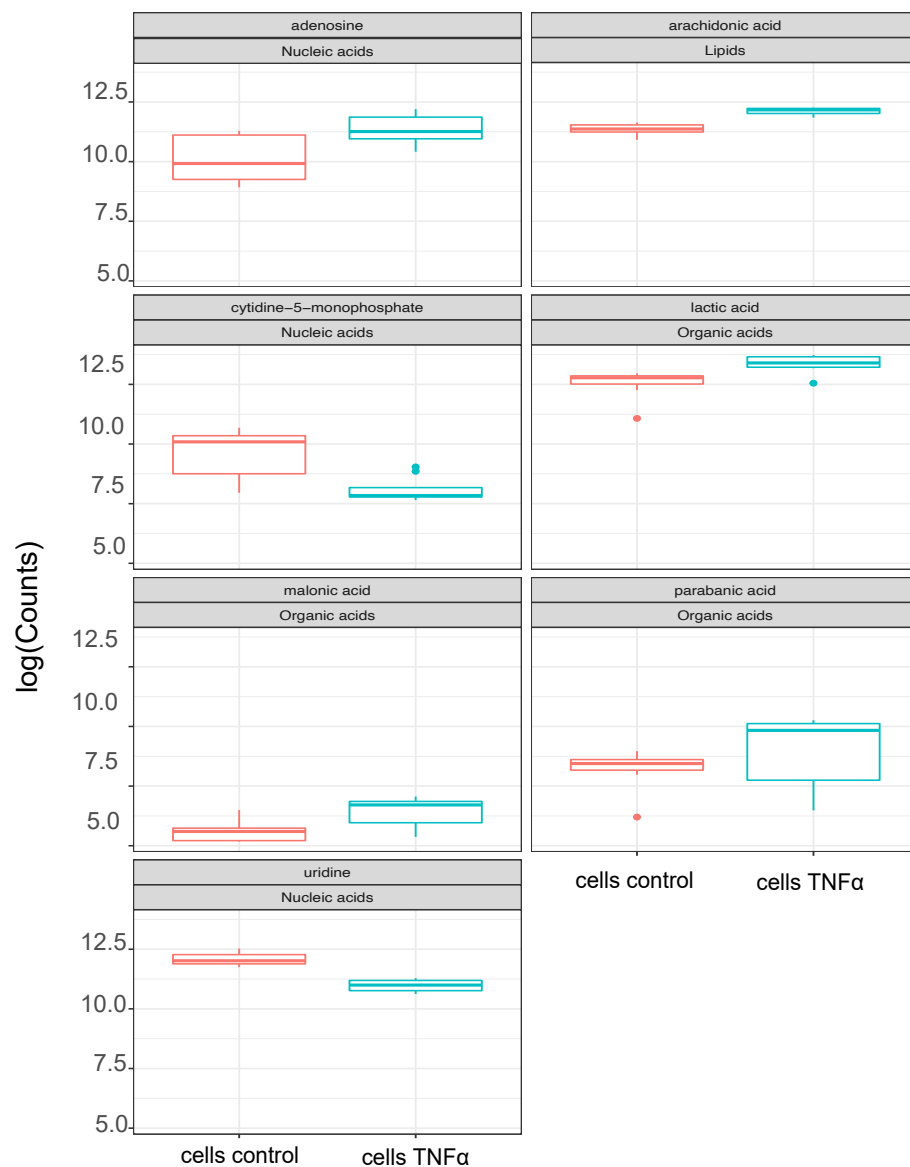

Treatment

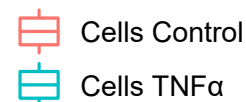

B)

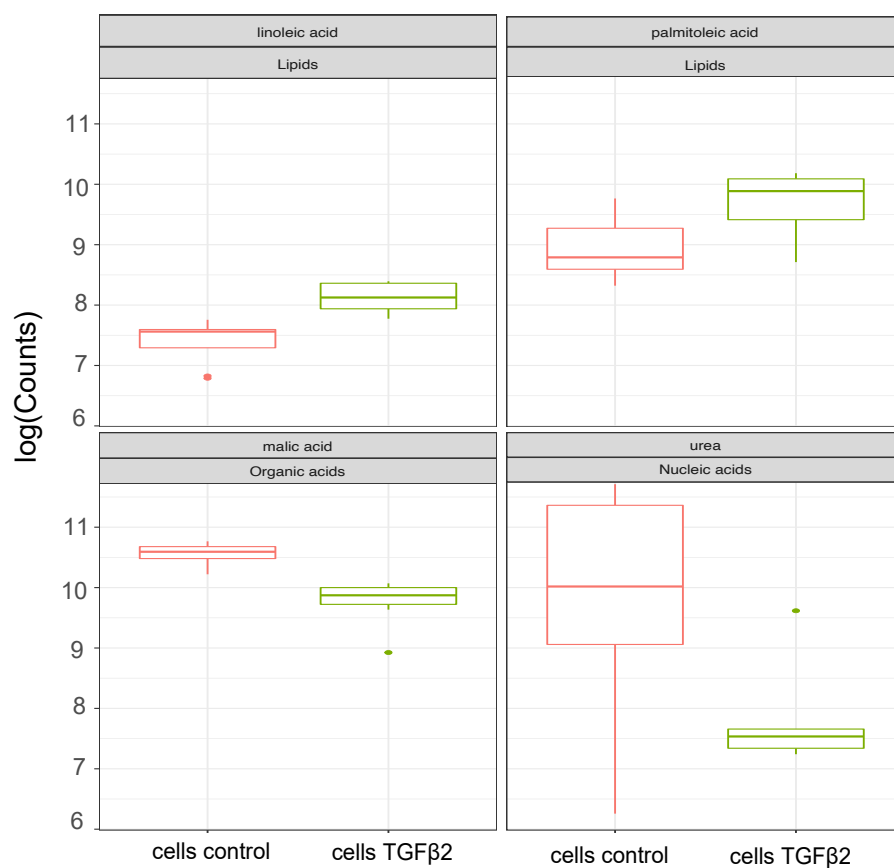

Treatment

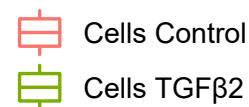

Supplement: s1 [file s1]

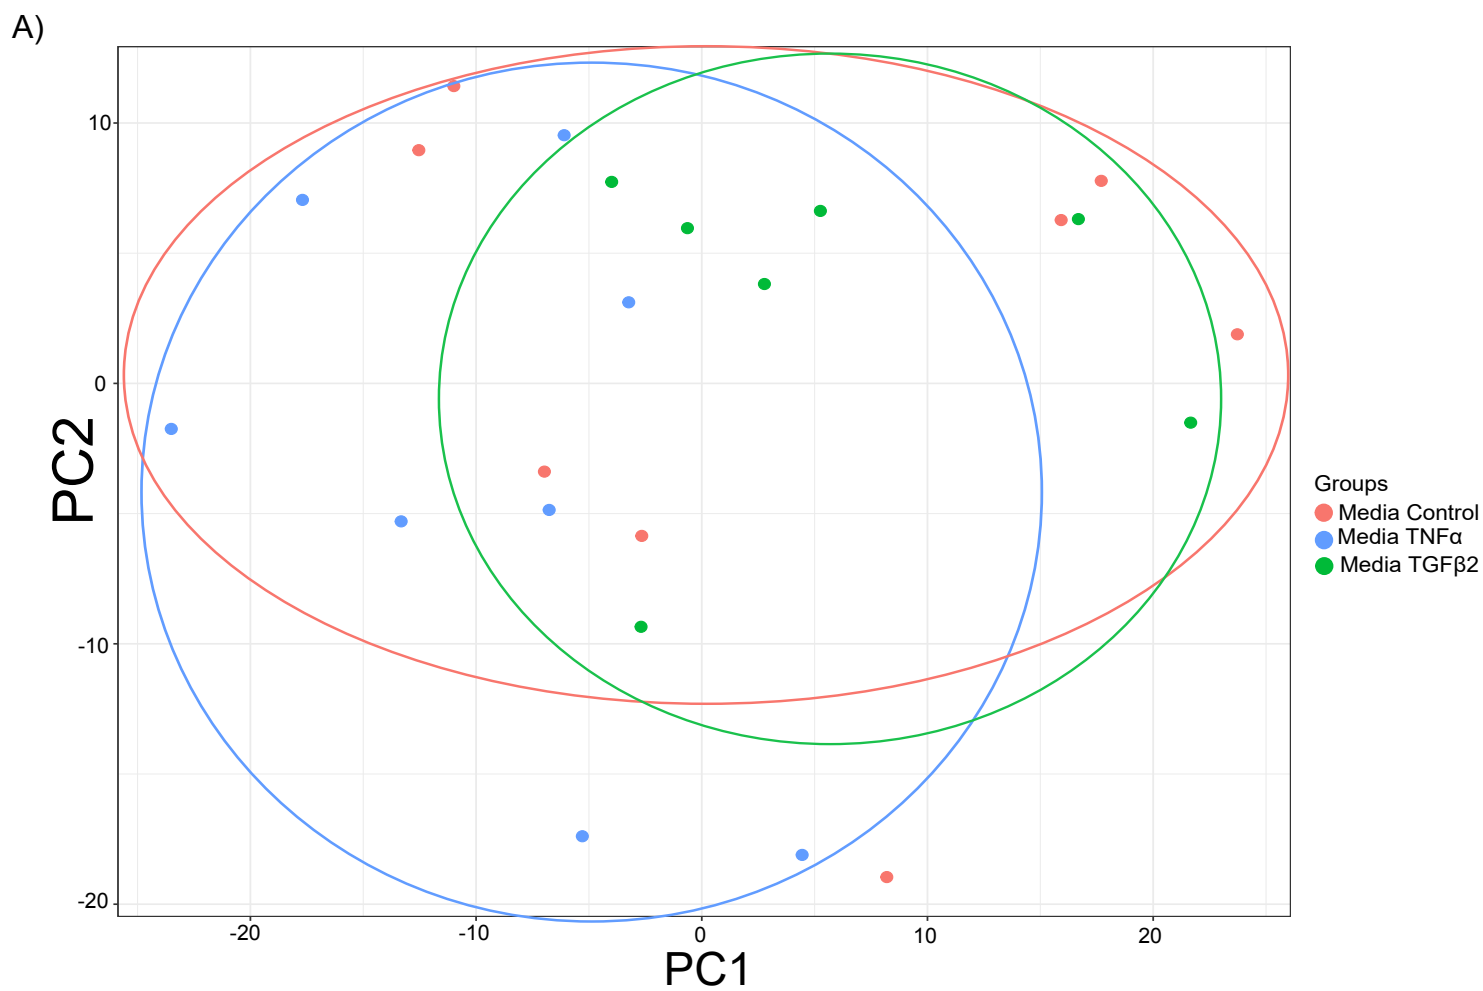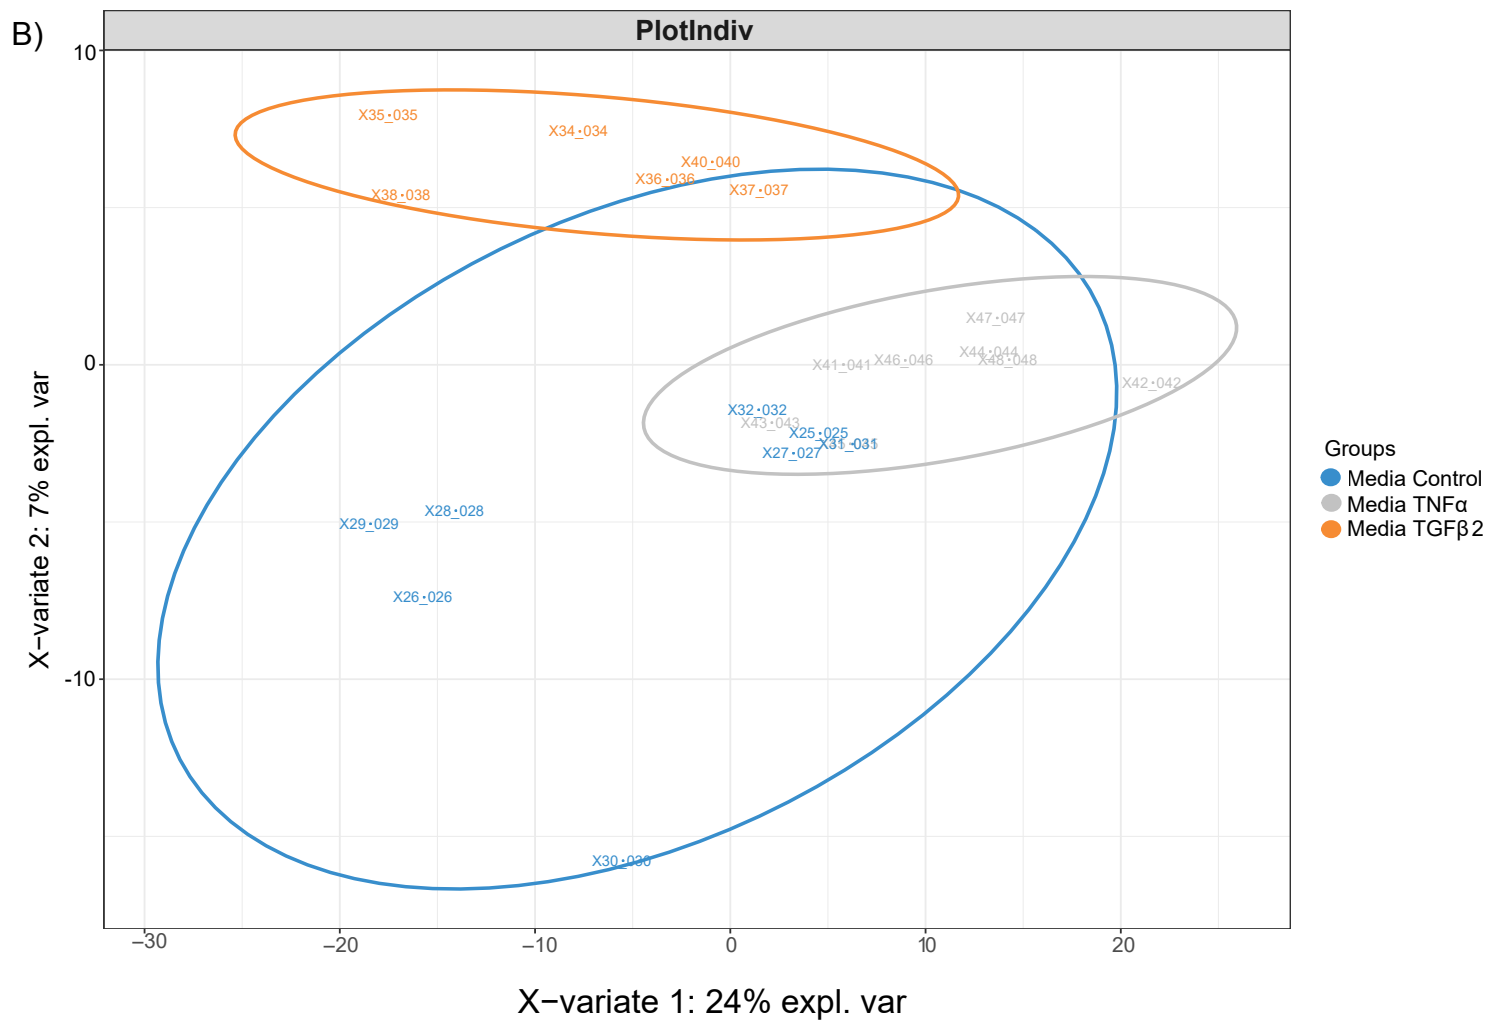

Supplement: s1 [file s1]
